# Supplementary material for: Hydrolysates of egg white proteins modulate T- and B-cell responses in mitogen-stimulated murine cells
Source: Royal Society of Chemistry journal article supplement (doi:10.1039/c5fo00614g), 2016-01-01
Supplement: c5fo00614g1.pdf [file c5fo00614g1.pdf]

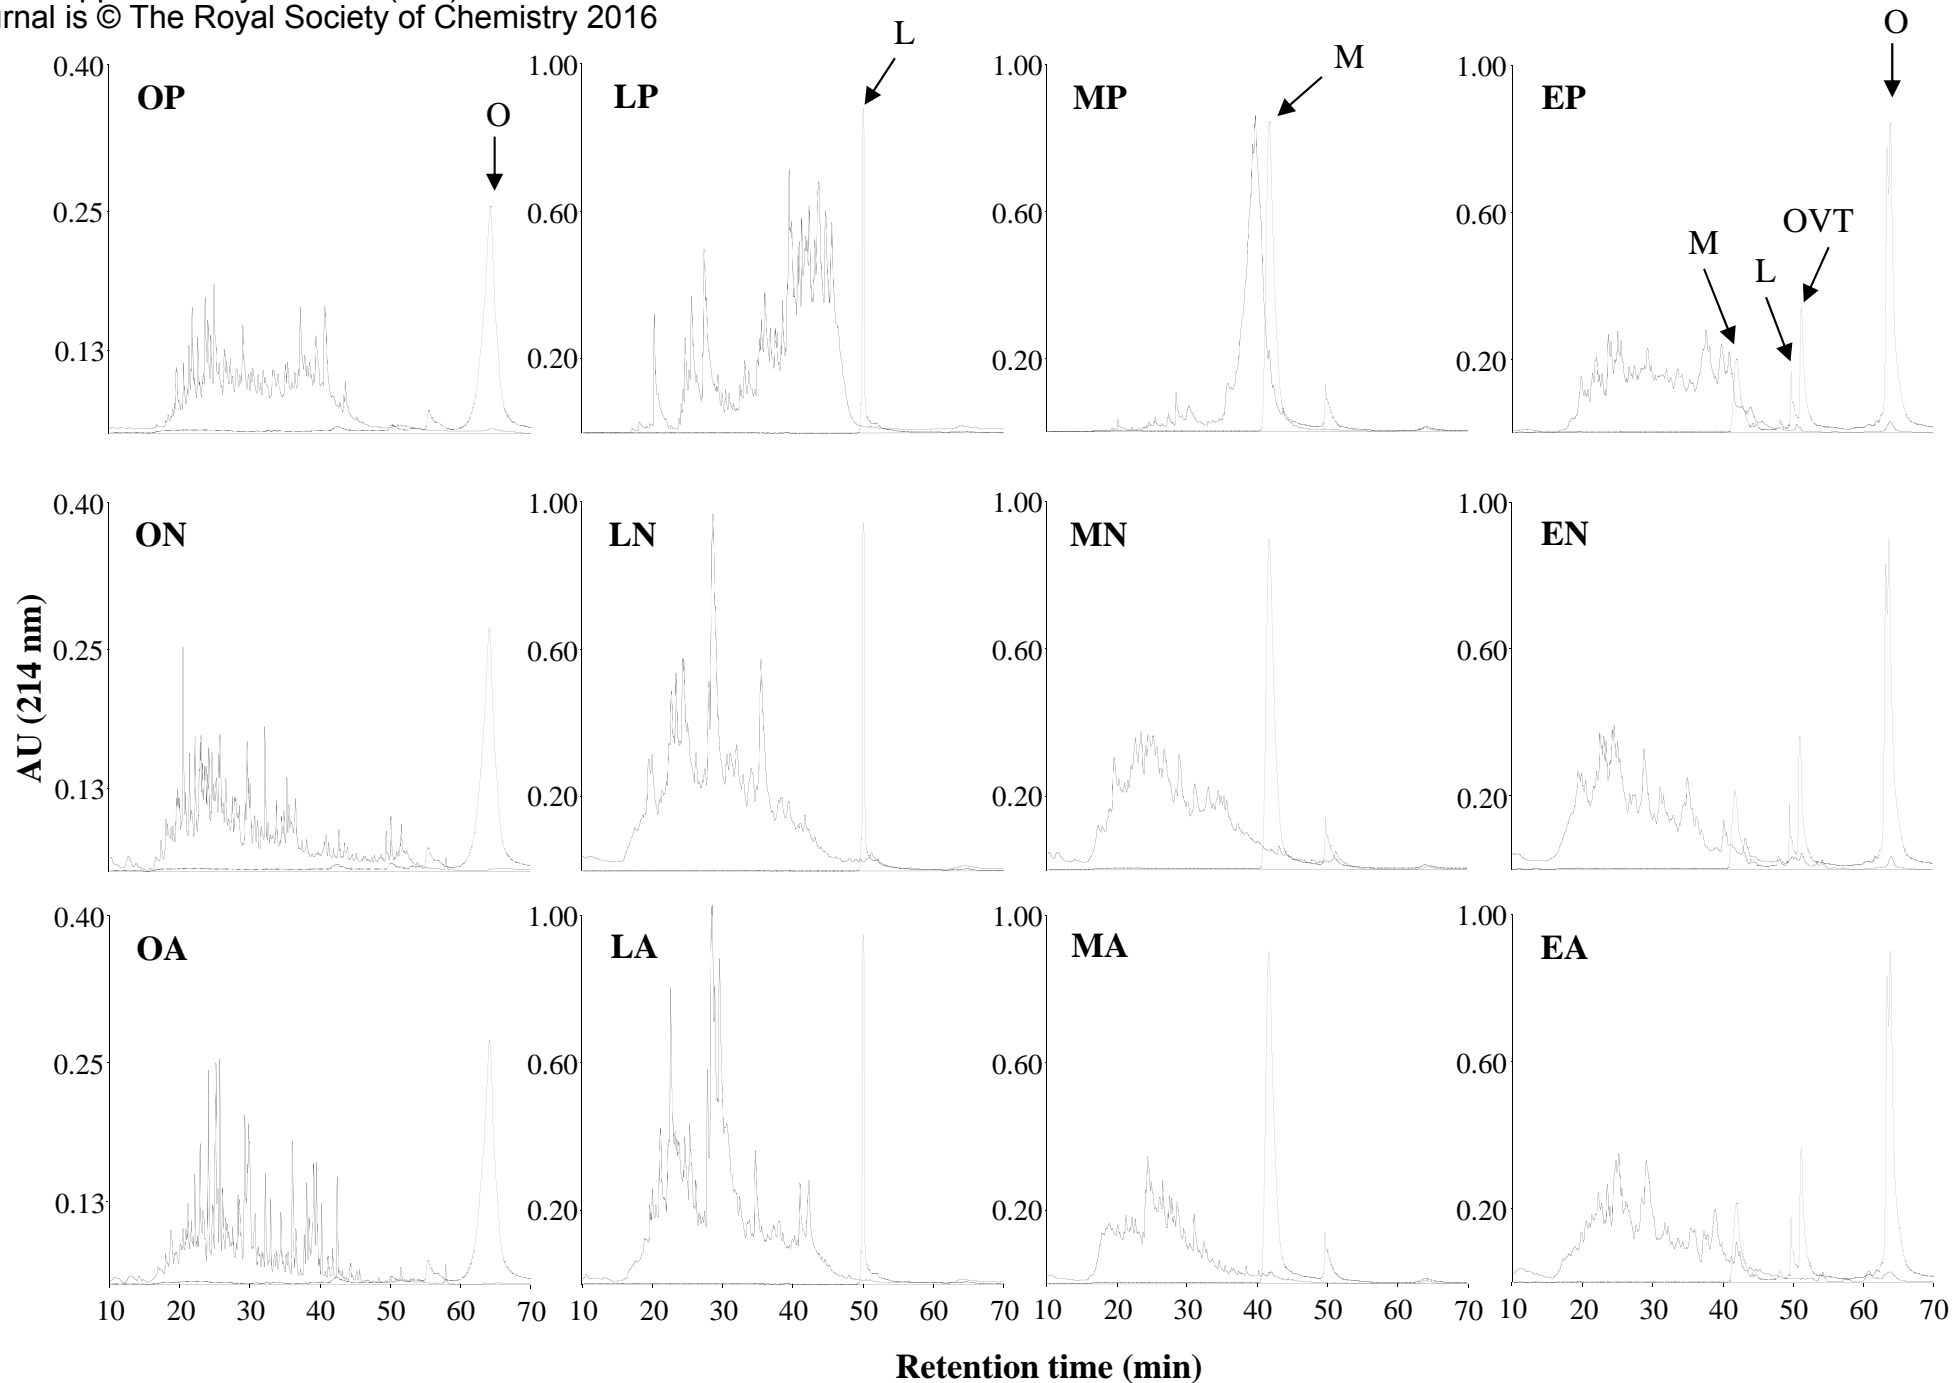

**Supplementary Fig. S1.** RP-HPLC patterns of ovalbumin (O), lysozyme (L), ovomucoid (M) and egg white (E) hydrolysates produced with pepsin (P), alcalase (A) and Neutrase (N). OVT designates ovotransferrin. The profile of the respective intact protein is drawn with a discontinuous grey line.

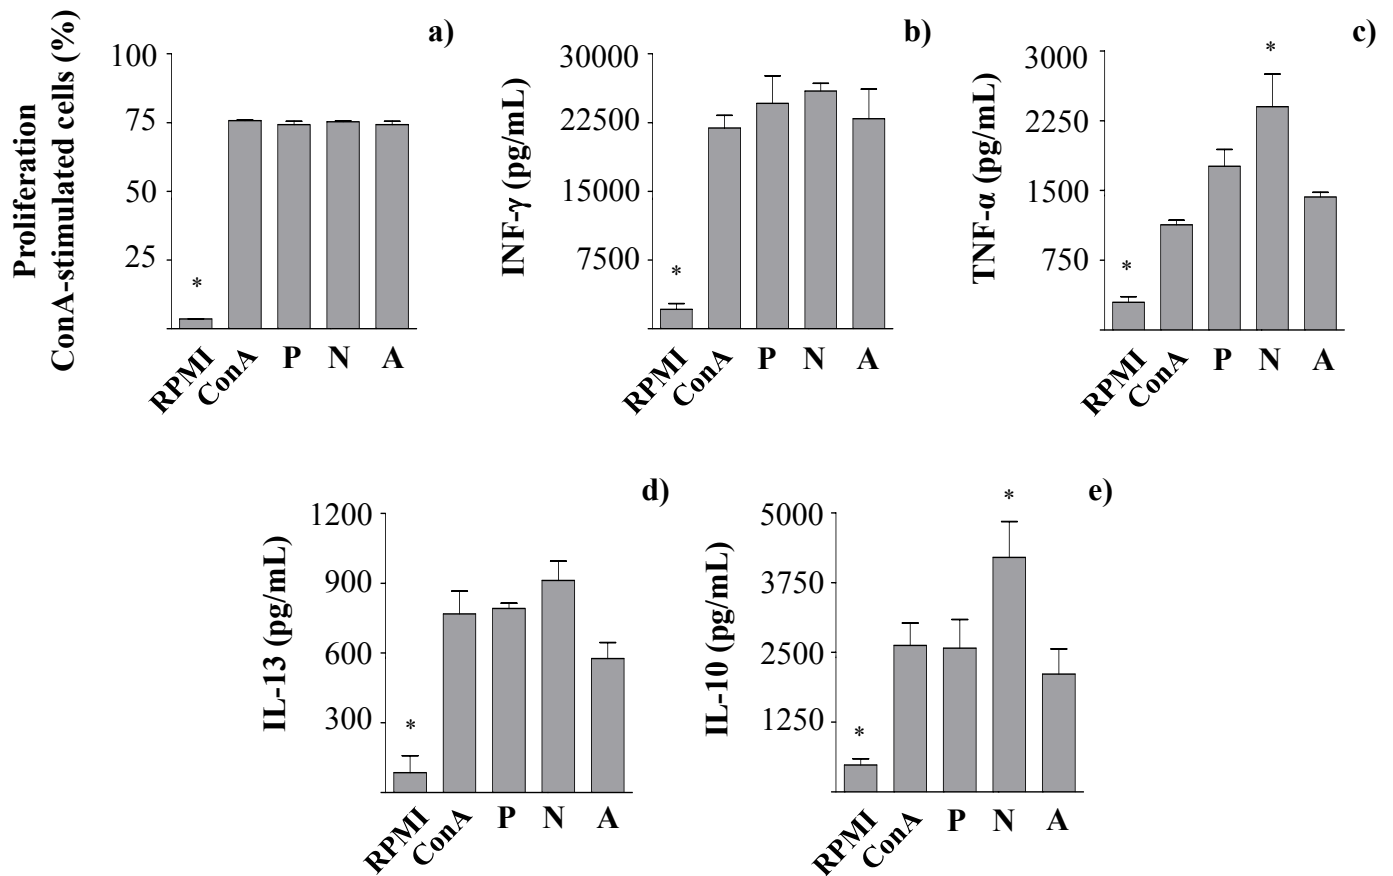

**Supplementary Fig. S2.** Effects of inactivated pepsin (P), Neutrase (N) and alcalase (A), at a concentration equivalent to that present in 200  $\mu\text{g/mL}$  of the hydrolysates, on the concanavalin A (ConA)-induced proliferation (a) and secretion of IFN- $\gamma$  (b), TNF- $\alpha$  (c), IL-13 (d) and IL-10 (e) by mouse splenocytes. Data are means  $\pm$  standard deviation of duplicates. \*  $P < 0.05$  compared to the ConA-stimulated control.

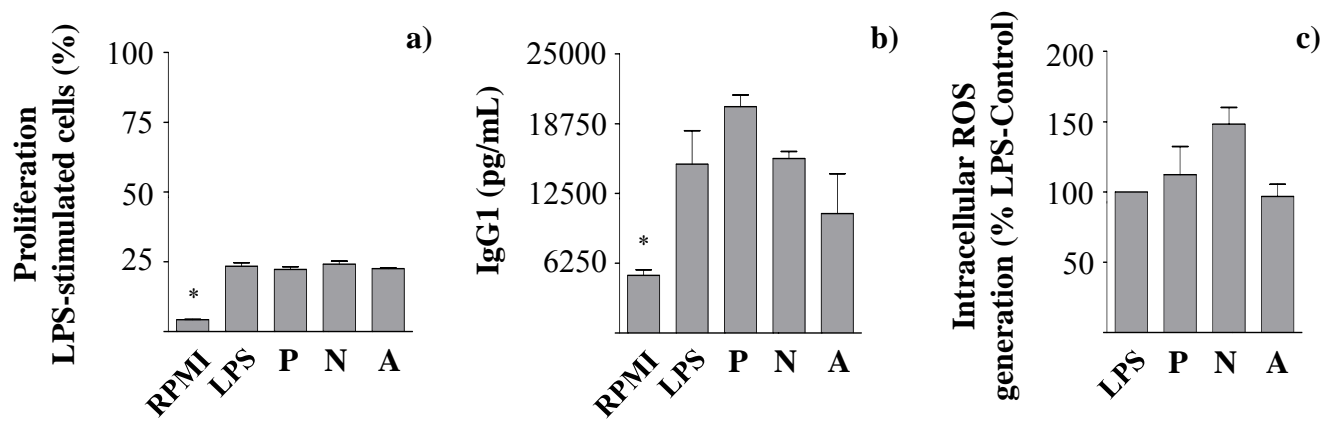

**Supplementary Fig. S3.** Effects of inactivated pepsin (P), Neutrase (N) and alcalase (A), at a concentration equivalent to that present in 200  $\mu\text{g}/\text{mL}$  of the hydrolysates, on the lipopolysaccharide (LPS)-induced proliferation (a), intracellular ROS generation (b) and secretion of IgG1 (c) by mouse splenocytes. Data are means  $\pm$  standard deviation of duplicates. \*  $P < 0.05$  compared to the LPS-stimulated control.

**Supplementary Table S1.** Mean values of the effects of the hydrolysates of ovalbumin, lysozyme, ovomucoid and egg white produced with pepsin, Neutrase and Alcalase on cytokine and antibody secretion, ROS production and cell proliferation by splenocytes and mesenteric lymph node (MLN) cells stimulated with concanavalin A (ConA) or lipopolysaccharide (LPS). In order to examine the influence of the enzyme used to produce the hydrolysates, one-way ANOVA was used, followed by the Fisher's Least Significant Difference (LSD) test.

|                                      | <b>Pepsin</b>         | <b>Neutrase</b>      | <b>Alcalase</b>      |
|--------------------------------------|-----------------------|----------------------|----------------------|
| <b>IFN-<math>\gamma</math></b>       | 56414.75              | 52525.75             | 55885.75             |
| <b>TNF-<math>\alpha</math></b>       | 969.25 <sup>ab</sup>  | 1148.00 <sup>b</sup> | 876.50 <sup>a</sup>  |
| <b>IL-13</b>                         | 3412.00 <sup>b</sup>  | 3530.75 <sup>b</sup> | 2446.75 <sup>a</sup> |
| <b>IL-10</b>                         | 4929.25               | 6035.00              | 5264.25              |
| <b>IgG1 produced by splenocytes</b>  | 14330.00              | 13361.50             | 12296.25             |
| <b>IgG1 produced by NLM cells</b>    | 1545.50 <sup>ab</sup> | 1772.75 <sup>b</sup> | 1242.00 <sup>a</sup> |
| <b>IgG2a produced by splenocytes</b> | 418.50                | 457.50               | 354.75               |
| <b>IgG2a produced by NLM cells</b>   | 80.50                 | 81.25                | 76.75                |
| <b>ROS produced by splenocytes</b>   | 65.16 <sup>b</sup>    | 68.82 <sup>b</sup>   | 51.45 <sup>a</sup>   |
| <b>Proliferation induced by ConA</b> | 70.85 <sup>b</sup>    | 66.58 <sup>a</sup>   | 68.51 <sup>ab</sup>  |
| <b>Proliferation induced by LPS</b>  | 26.50                 | 28.09                | 25.53                |

<sup>a, b</sup> Different letters indicate significant differences ( $P < 0.05$ ) within rows.
